# Supplementary material for: The R941L mutation in MYH14 disrupts mitochondrial fission and associates with peripheral neuropathy
Source: PubMed Central journal article supplement — eBioMedicine. 2019 Jun 21;45:379–92. doi: 10.1016/j.ebiom.2019.06.018 (PMC6642256; doi:10.1016/j.ebiom.2019.06.018), 2019-06-21
Supplement: mmc1.pdf [file mmc1.pdf]

## Supplemental Table 1

Original (WT):

CTTCAACAAGAATCGGAGAACAGTGCTGAACTGGACGATATCCGTGGTCGCTTCA  
GACTCGCAACAAGAGCTCGAGTATATTGTCAACGATATGAGAGACCGTCTTTCCGA  
GGAAGAACAG

Template (sb139):

CTTCAACAAGAATCGGAGAACAGTGCTGAACTGGACGATATCCGTGGTCGCTTCAG  
ACTCTAAACAAGAGCTCGAGTATATTGTCAACGATATGAGAGACCGTCTTTCCGAGG  
AAGAACAG

gRNA-1: ACTGGACGATATCCGTGGT CGG

gRNA-2: GACAATATACTCGAGCTCT TGG

>nmy1sgRNA1fwd

gACTGGACGATATCCGTGGTgtttaagagctatgctgg

>nmy1sgRNA1rev

ACCACGGATATCGTCCAGTcaagacatctcgcaataggagg

>nmy1sgRNA2fwd

gGACAATATACTCGAGCTCTgtttaagagctatgctgg

>nmy1sgRNA2rev

AGAGCTCGAGTATATTGTCcaagacatctcgcaataggagg

>oJW1787

ATTGTGTTTCGTTGAGTGACCC

>oJW1790

AAAAATAGGCGTATCACGAGG
