# Supplementary material for: The R941L mutation in MYH14 disrupts mitochondrial fission and associates with peripheral neuropathy
Source: PubMed Central journal article supplement — eBioMedicine. 2019 Jun 21;45:379–92. doi: 10.1016/j.ebiom.2019.06.018 (PMC6642256; doi:10.1016/j.ebiom.2019.06.018), 2019-06-21
Supplement: mmc2.pdf [file mmc2.pdf]

Supplemental Table 2

| Pedigree Designation     | II-5 | III-2                                                                                                             | IV-1                                  | IV-2                                                            |
|--------------------------|------|-------------------------------------------------------------------------------------------------------------------|---------------------------------------|-----------------------------------------------------------------|
| Fibroblast Designation   | N/A  | Patient 1                                                                                                         | Patient 2                             | Patient 3                                                       |
| Age at last assessment   | N/A  | 58                                                                                                                | 23                                    | 24                                                              |
| Sex                      | F    | F                                                                                                                 | M                                     | F                                                               |
| Onset age (years)        |      | 9                                                                                                                 | <1 (hearing loss), 10 (foot weakness) | 4 (hearing loss), 10 (foot weakness)                            |
| Age deceased             | 86   | N/A                                                                                                               | N/A                                   | N/A                                                             |
| Initial symptom          | N/A  | Tripping                                                                                                          | Hearing loss                          | Hearing loss                                                    |
| Other medical history    | N/A  | Diabetes type II<br>Intrinsic hand muscles, anterior/posterior calf and intrinsic foot muscles; pes cavus present | Mild language delay                   | Attention-deficit disorder                                      |
| Atrophy                  | N/A  | Hyporeflexia arms, areflexia in legs                                                                              | Atrophy calves and feet, mild.        | Intrinsic hand muscles, calf muscles and intrinsic foot muscles |
| Reflexes                 |      |                                                                                                                   | Absent Achilles reflex                | Reduced in arms and Achilles tendon                             |
| Muscle power (MRC scale) |      |                                                                                                                   |                                       |                                                                 |
| Shoulder abduction       | N/A  | 5                                                                                                                 | 5                                     | 5                                                               |
| Elbow flexion            | N/A  | 5                                                                                                                 | 5                                     | 5                                                               |
| Elbow extension          | N/A  | 4-                                                                                                                | 5                                     | 5                                                               |
| Wrist extension          | N/A  | 4-                                                                                                                | 5                                     | 4+                                                              |
| Wrist flexion            | N/A  | 4-                                                                                                                | 5                                     | 4+                                                              |
| Finger extension         | N/A  | 3                                                                                                                 | 5                                     | 4                                                               |
| Finger flexion           | N/A  | 3                                                                                                                 | 5                                     | 4                                                               |
| Finger abduction         | N/A  | 3                                                                                                                 | 5-                                    | 4                                                               |
| Hip flexion              | N/A  | 5                                                                                                                 | 5                                     | 5                                                               |
| Knee extension           | N/A  | 5                                                                                                                 | 5                                     | 5                                                               |
| Knee flexion             | N/A  | 5                                                                                                                 | 5                                     | 5                                                               |
| Ankle dorsiflexion       | N/A  | 1                                                                                                                 | 4                                     | 3                                                               |
| Ankle plantarflexion     | N/A  | 3                                                                                                                 | 5-                                    | 4                                                               |

|                            |     |                                                            |        |                                                                                                                                                             |
|----------------------------|-----|------------------------------------------------------------|--------|-------------------------------------------------------------------------------------------------------------------------------------------------------------|
| Sensory symptoms           | N/A | Numbness, dysesthesiae below knees                         | -      | -                                                                                                                                                           |
| Sensory exam               | N/A | Reduced cold sensation below knees; normal vibration sense | Normal | Normal                                                                                                                                                      |
| Sensorineural hearing loss | +   | +                                                          | +++    | ++                                                                                                                                                          |
| Dysarthria                 | N/A | -                                                          | +      | -                                                                                                                                                           |
| Pulmonary function tests   | N/A | Normal                                                     | Normal | Normal                                                                                                                                                      |
| Echocardiogram             | N/A | N/A                                                        | N/A    | Normal                                                                                                                                                      |
|                            |     |                                                            |        | Fatty infiltration of gastrocnemius, soleus and extensor digitorum muscles. Asymmetric/mild involvement of left anterior compartment muscles in lower legs. |
| Muscle MRI                 | N/A | Lipomatous atrophy of calf musculature                     | N/A    |                                                                                                                                                             |
| Neurophysiology            | N/A | Consistent with axonal polyneuropathy                      | N/A    | N/A                                                                                                                                                         |
