# Supplementary material for: The R941L mutation in MYH14 disrupts mitochondrial fission and associates with peripheral neuropathy
Source: PubMed Central journal article supplement — eBioMedicine. 2019 Jun 21;45:379–92. doi: 10.1016/j.ebiom.2019.06.018 (PMC6642256; doi:10.1016/j.ebiom.2019.06.018), 2019-06-21
Supplement: mmc7.pdf [file mmc7.pdf]

a

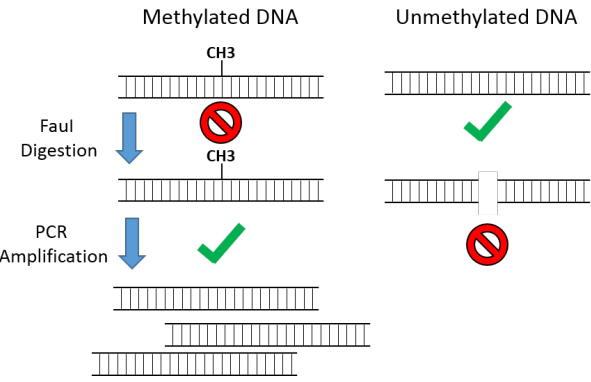

b

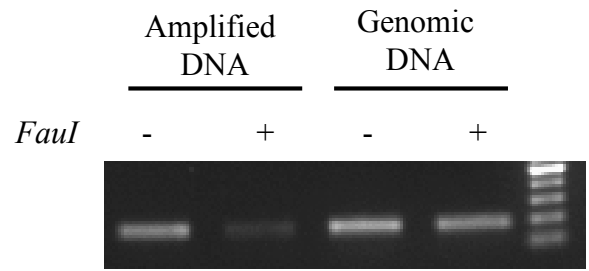

Supplemental Figure 1

## Mitochondrial Morphology in Control Fibroblasts

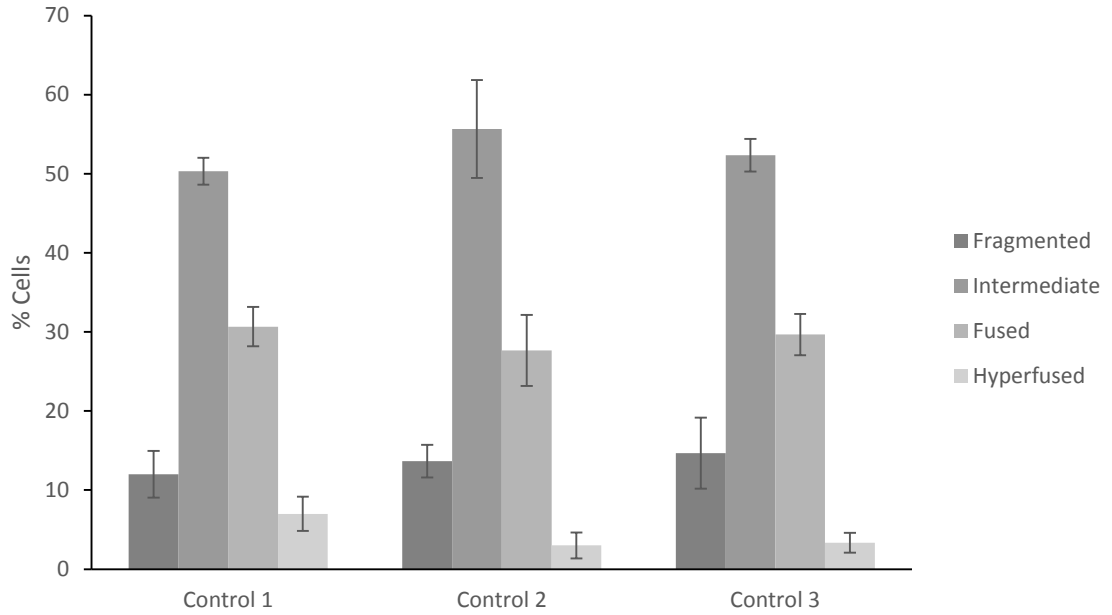

|       |       |       |       |                 |
|-------|-------|-------|-------|-----------------|
|       | Ala   | Arg   | Lys   |                 |
| WT    | G C C | CpG C | A A G |                 |
|       | C G G | GpC G | T T C |                 |
|       | Ala   | Leu   | Lys   |                 |
| R941L | G C C | C T C | A A G | Allele count 0  |
|       | C G G | G A G | T T C |                 |
|       | Ala   | Cys   | Lys   |                 |
| R941C | G C C | T G C | A A G | Allele count 1  |
|       | C G G | A C G | T T C |                 |
|       | Ala   | Ser   | Lys   |                 |
| R941S | G C C | A G C | A A G | Allele count 1  |
|       | C G G | T C G | T T C |                 |
|       | Ala   | His   | Lys   |                 |
| R941H | G C C | C A C | A A G | Allele count 10 |
|       | C G G | G T G | T T C |                 |
